# Supplementary material
Source: PubMed Central journal article supplement (PMC2780790)
Supplement: 0907720106_0907720106SI.pdf [file 0907720106_0907720106SI.pdf]

# Supporting Information

Chang et al. 10.1073/pnas.0907720106

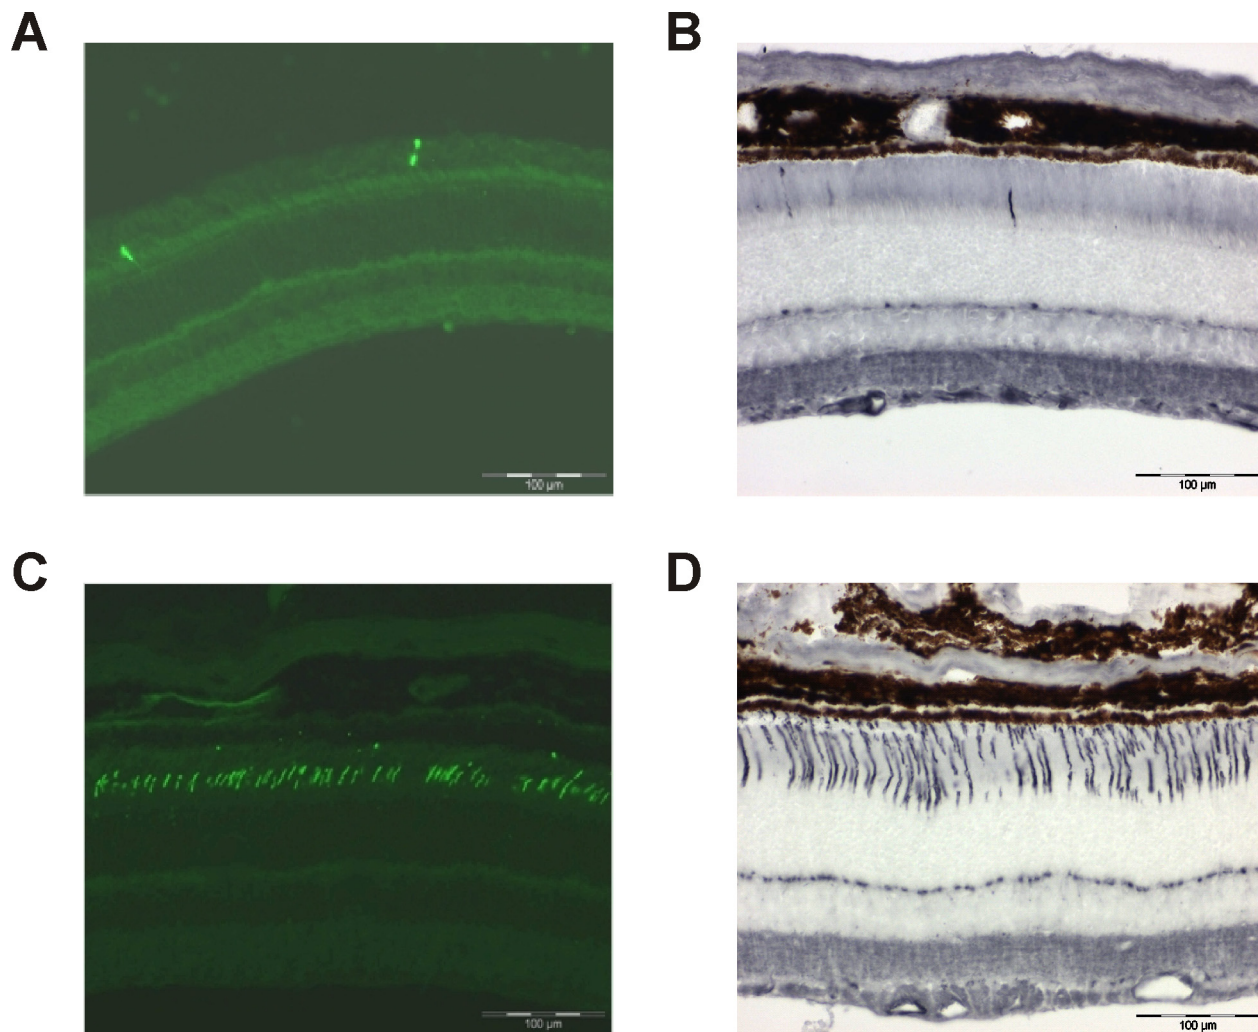

**Fig. S1.** Nearly complete loss of cones in 5-month-old *cpfl1* mice. Retinal sections of a 5-month-old *cpfl1* mutant were immunostained with an antibody against the M opsin (A) or stained with HRP-conjugated peanut agglutinin that specifically binds to cone sheaths (B), respectively. In comparison with an age-matched C57BL/6J control (C and D) there were only very few cones left in the *cpfl1* retina.









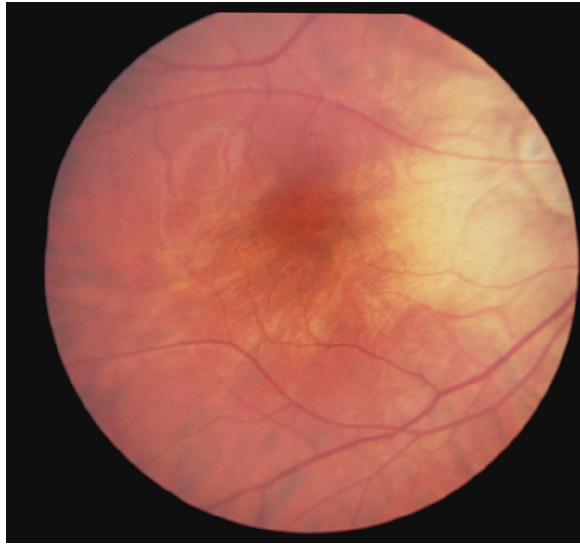

**Fig. S6.** Fundus alterations in a patient with *PDE6C*-associated achromatopsia. Fundus photograph of the right eye of patient CHRO 9/II:3 showing the posterior pole with the macula with evidence of a weak and incomplete foveal reflex around the fovea, pigment mottling of the fovea and atrophy of the retinal pigment epithelium around the optic disc.
